# Supplementary material for: Utilizing a tablet-based artificial intelligence system to assess movement disorders in a prospective study
Source: PubMed Central journal article supplement (PMC10293248; doi:10.1038/s41598-023-37388-3), 2023-06-26
Supplement: 41598_2023_37388_MOESM1_ESM.pdf [file 41598_2023_37388_MOESM1_ESM.pdf]

**S1) A list of all used Features including their category. Tablet-based Features are split among precision-based, force-based, and time-based features.**

| Feature category  | Feature ID | Feature Name            | Preprocessing                             | Explanation                                                                                                                                                                                                                                                                                                                                                                                                                                                                                                                                                                                                                    |
|-------------------|------------|-------------------------|-------------------------------------------|--------------------------------------------------------------------------------------------------------------------------------------------------------------------------------------------------------------------------------------------------------------------------------------------------------------------------------------------------------------------------------------------------------------------------------------------------------------------------------------------------------------------------------------------------------------------------------------------------------------------------------|
| Questionnaire     | Qyes       | Qyes                    | None                                      | Qyes is the count of positive answered questions in the Parkinson Disease Non-Motor Scale questionnaire. Thus, the possible range is between 0 (all questions answered with "no") and 30 (all the answers are "yes").                                                                                                                                                                                                                                                                                                                                                                                                          |
| Precision feature | F1c        | DistanceFFT             | Excision of first and last 10 percent     | For F1 <i>DistanceFFT</i> , a discrete fast Fourier transformation (FFT) was applied on the distance-time series with the Python 3.8 NumPy package (version 1.20.2). The new timeseries was separated in the frequency spectrum between 3 and 15 Hz into 20 bins. On these bins, the standard deviation was calculated to see if there is a dominant frequency. In the case of a dominant frequency, a peak in the FFT data is observed corresponding to a low standard deviation. For further analysis, the absolute value of the difference between both sides is calculated to give information about monitored laterality. |
|                   | F2         | MaxDistance             | Excision of 5 percent most extreme values | Feature F2 <i>MaxDistance</i> calculates the maximal distance for each drawn spiral to the given spiral.                                                                                                                                                                                                                                                                                                                                                                                                                                                                                                                       |
|                   | F3         | MeanDistance            | Excision of 5 percent most extreme values | Feature F3 <i>MeanDistance</i> calculates the mean distance for each drawn spiral to the given spiral.                                                                                                                                                                                                                                                                                                                                                                                                                                                                                                                         |
|                   | F4         | StDevDistance           | None                                      | Feature F4 <i>StDevDistance</i> calculates the standard deviation of the distance for each drawn spiral to the given spiral.                                                                                                                                                                                                                                                                                                                                                                                                                                                                                                   |
|                   | F5         | ChangeOfRadiusDirection | Excision of first and last 10 percent     | Feature F5 <i>ChangeOfRadiusDirection</i> counts the times the radius goes from increasing to decreasing and the other way around.                                                                                                                                                                                                                                                                                                                                                                                                                                                                                             |
|                   | F6         | ChangeOfDirectionX      | Excision of first and last 10 percent     | Feature F6 <i>ChangeOfDirectionX</i> counts the times the trend in the x-axis goes from increasing to decreasing and the other way around.                                                                                                                                                                                                                                                                                                                                                                                                                                                                                     |
|                   | F7         | ChangeOfDirectionY      | Excision of first and last 10 percent     | Feature F7 <i>ChangeOfDirectionY</i> counts the times the trend in the y-axis goes from increasing to decreasing and the other way around.                                                                                                                                                                                                                                                                                                                                                                                                                                                                                     |
| Force feature     | F8         | MeanForce               | Excision of 5 percent most extreme values | F8 <i>MeanForce</i> is the value the mean of the corresponding force timeseries.                                                                                                                                                                                                                                                                                                                                                                                                                                                                                                                                               |
|                   | F9         | StDevForce              | None                                      | F9 <i>StDevForce</i> is the value of the standard deviation of the corresponding force timeseries.                                                                                                                                                                                                                                                                                                                                                                                                                                                                                                                             |
|                   | F10        | MedianForce             | None                                      | F10 <i>MedianForce</i> is the value of the median of the corresponding force timeseries.                                                                                                                                                                                                                                                                                                                                                                                                                                                                                                                                       |
| Time feature      | F11        | TimeOfDrawing           | None                                      | F11 <i>TimeOfDrawing</i> discloses the total drawing time.                                                                                                                                                                                                                                                                                                                                                                                                                                                                                                                                                                     |
|                   | F12        | MeanVelocity            | Excision of 5 percent most extreme values | F12 <i>MeanVelocity</i> gives information about the mean drawing velocity.                                                                                                                                                                                                                                                                                                                                                                                                                                                                                                                                                     |
|                   | F13        | StDevVelocity           | Excision of 5 percent most extreme values | F13 <i>StdDevVelocity</i> is the standard deviation of the drawing velocity time series.                                                                                                                                                                                                                                                                                                                                                                                                                                                                                                                                       |
