# Supplementary material for: Utilizing a tablet-based artificial intelligence system to assess movement disorders in a prospective study
Source: PubMed Central journal article supplement (PMC10293248; doi:10.1038/s41598-023-37388-3), 2023-06-26

## S2: Spearman correlations

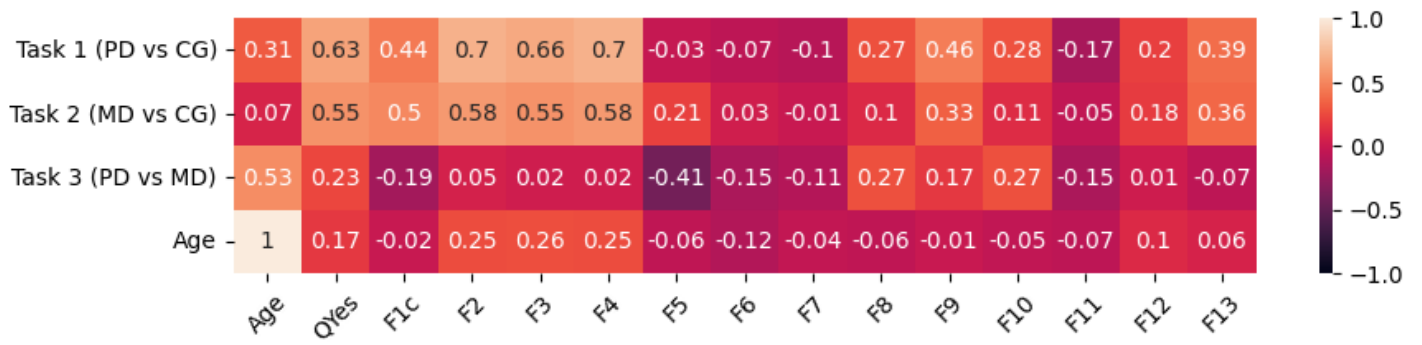

Supplement: 41598_2023_37388_MOESM2_ESM.pdf [file 41598_2023_37388_MOESM2_ESM.pdf]
