# Supplementary material for: Utilizing a tablet-based artificial intelligence system to assess movement disorders in a prospective study
Source: PubMed Central journal article supplement (PMC10293248; doi:10.1038/s41598-023-37388-3), 2023-06-26
Supplement: 41598_2023_37388_MOESM3_ESM.pdf [file 41598_2023_37388_MOESM3_ESM.pdf]

a) Distribution of feature: QYes

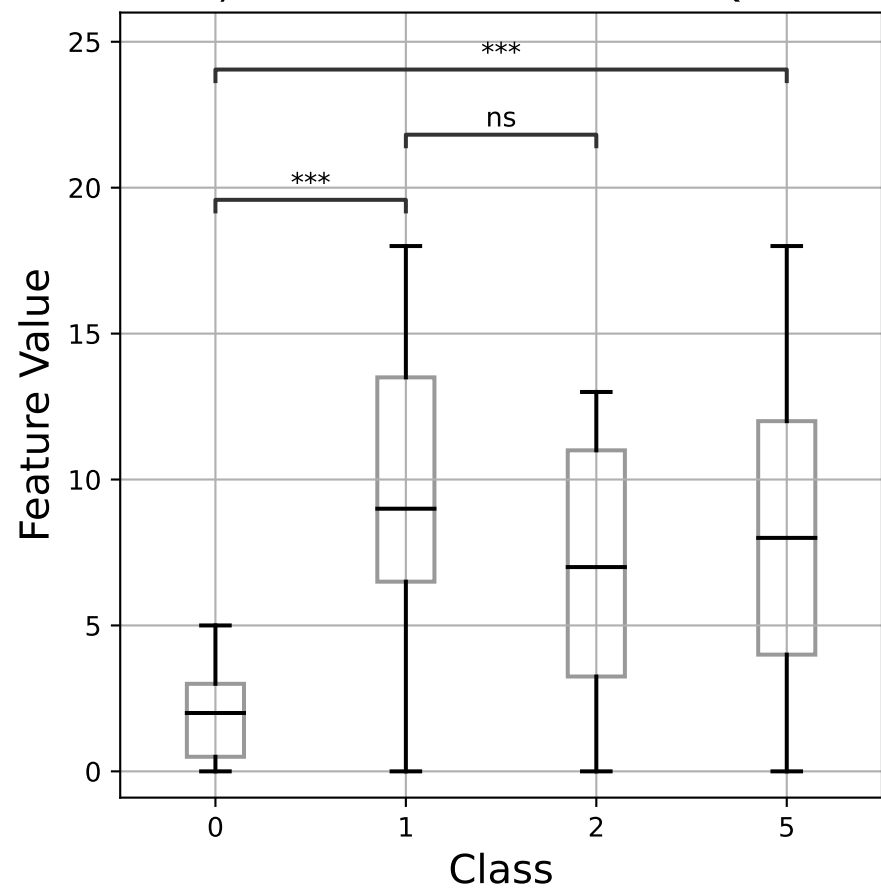

b) Distribution of F1c: DistanceFFT

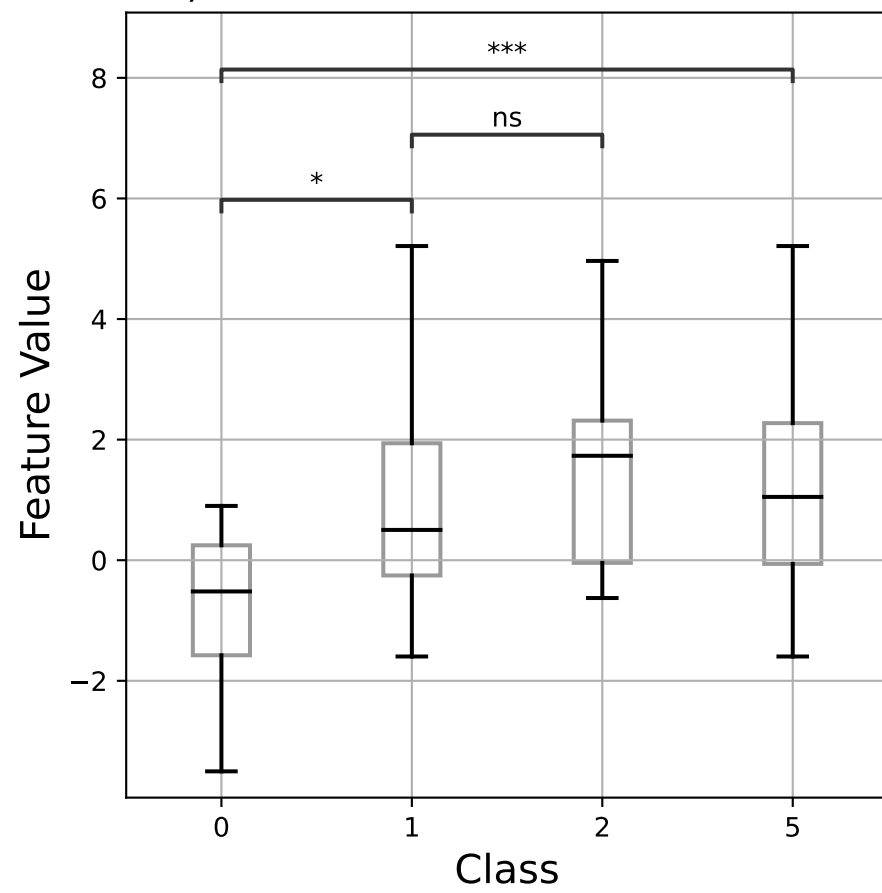

c) Distribution of F2: MaxDistance

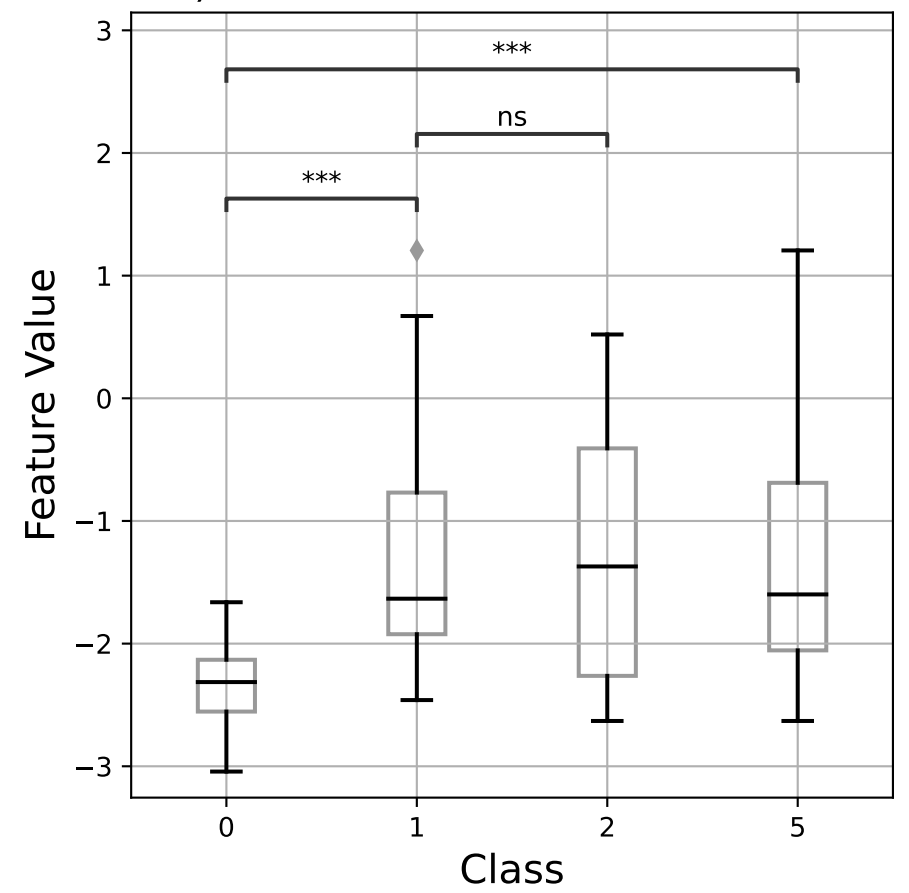

d) Distribution of F3: MeanDistance

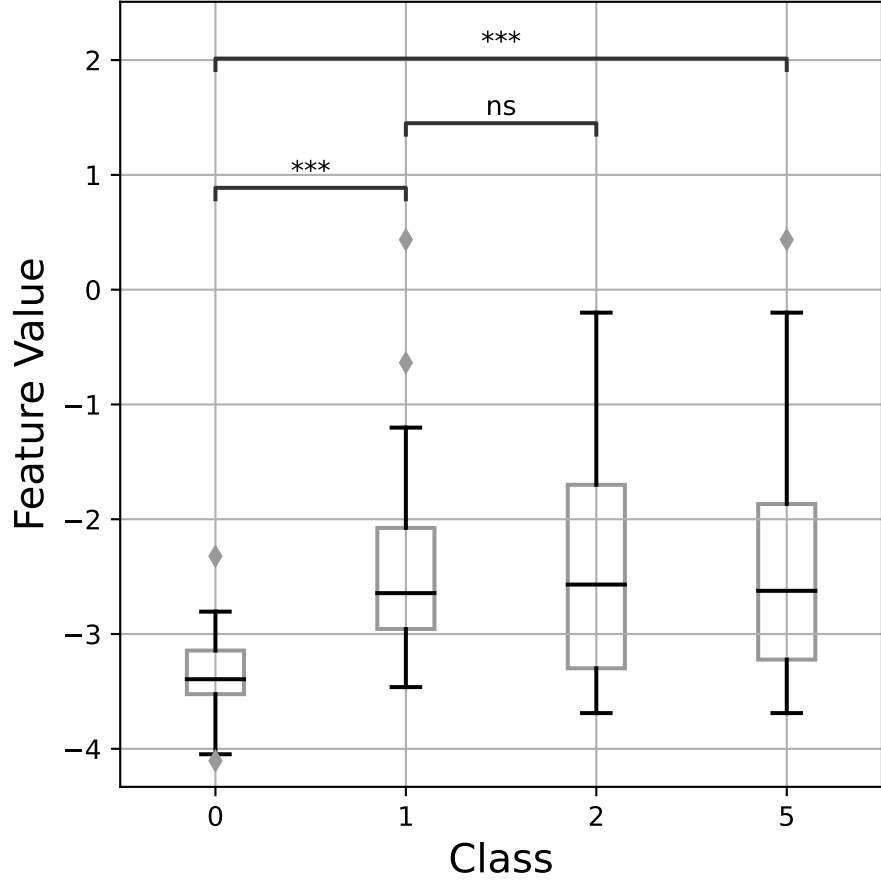

e) Distribution of F4: StDevDistance

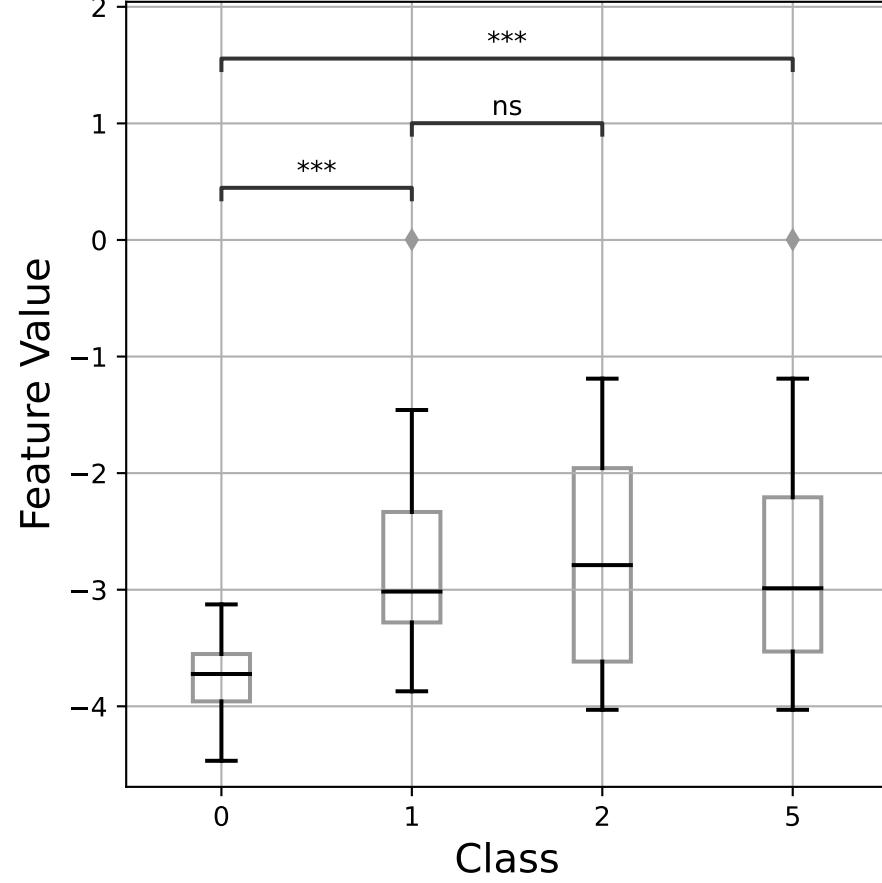

f) Distribution of F5: ChangeOfRadiusDirection

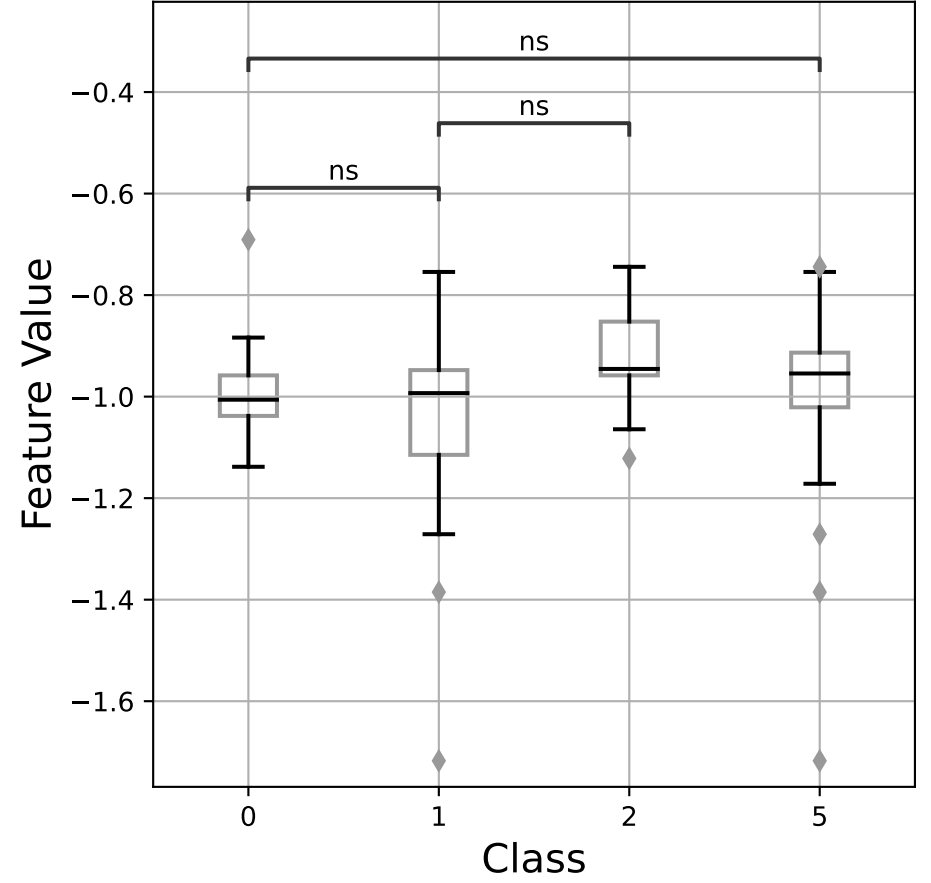

g) Distribution of F6: ChangeOfDirectionX

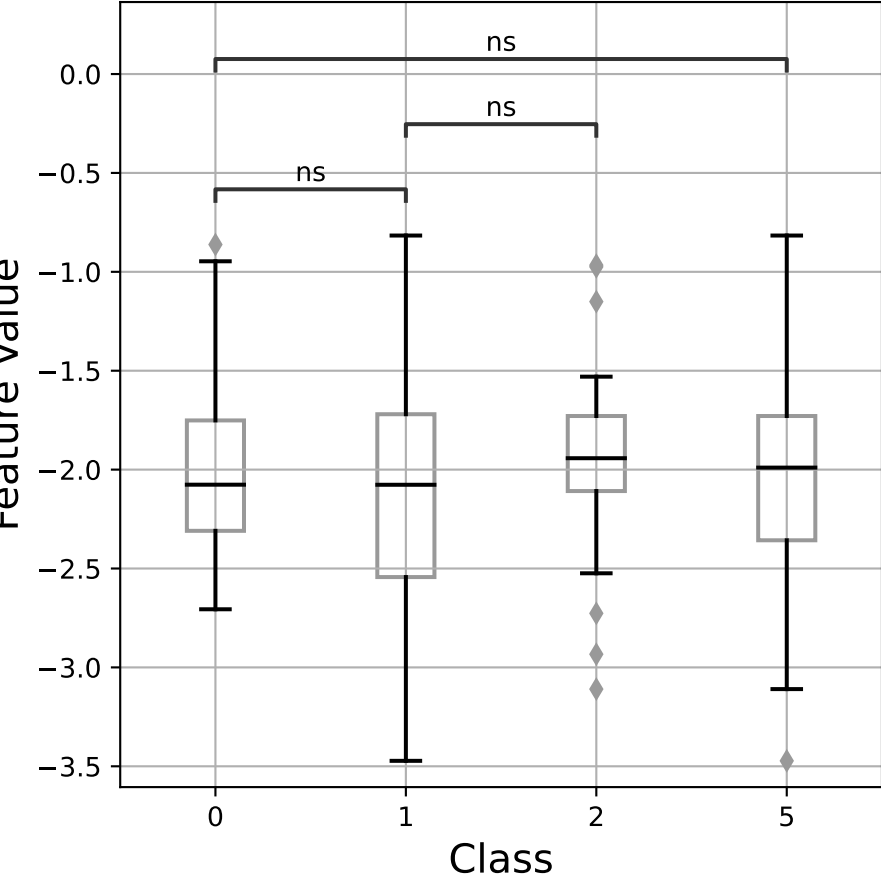

h) Distribution of F7: ChangeOfDirectionY

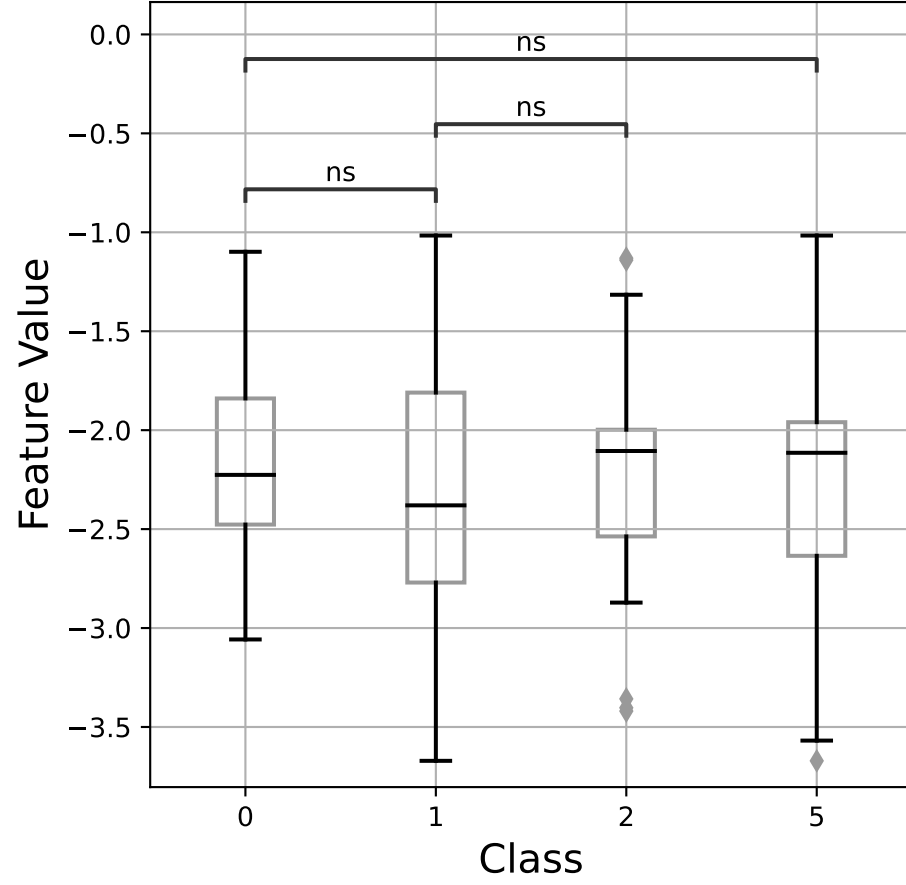

i) Distribution of F8: MeanForce

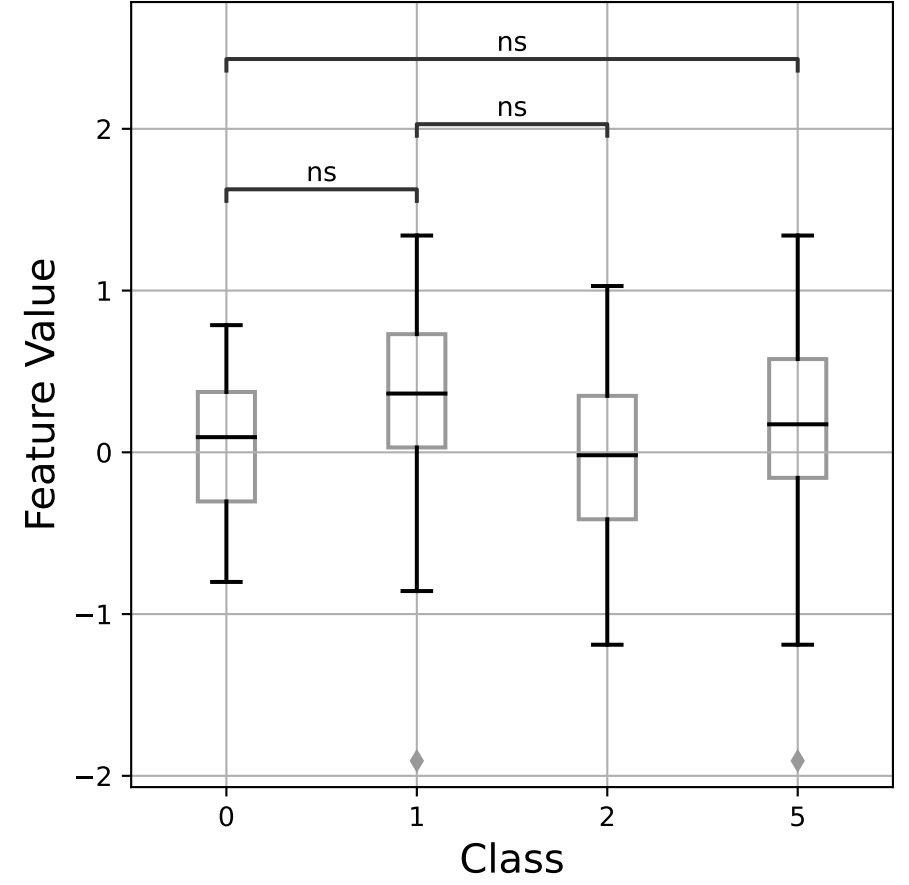

j) Distribution of F9: StDevForce

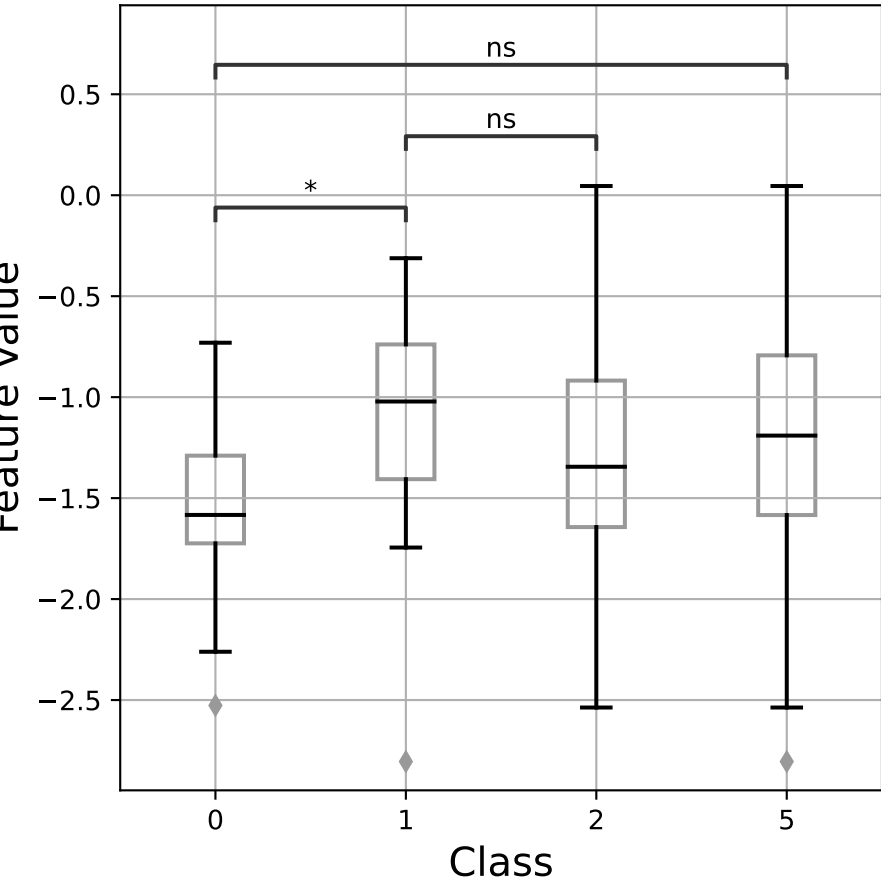

k) Distribution of F10: MedianForce

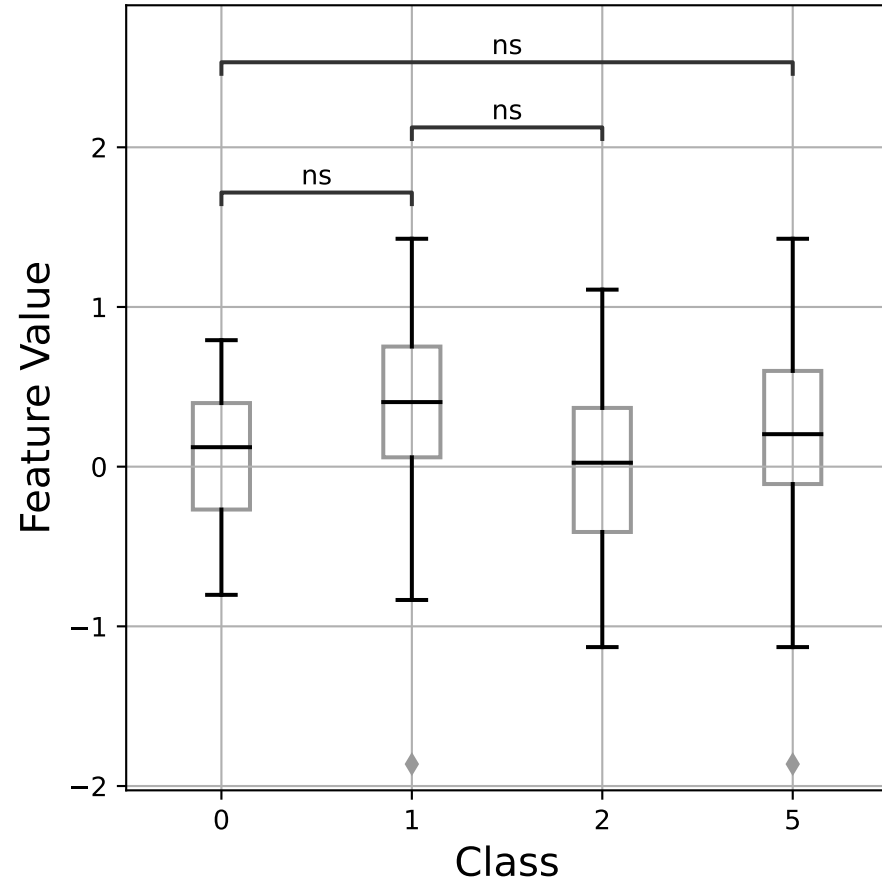

l) Distribution of F11: TimeOfDrawing

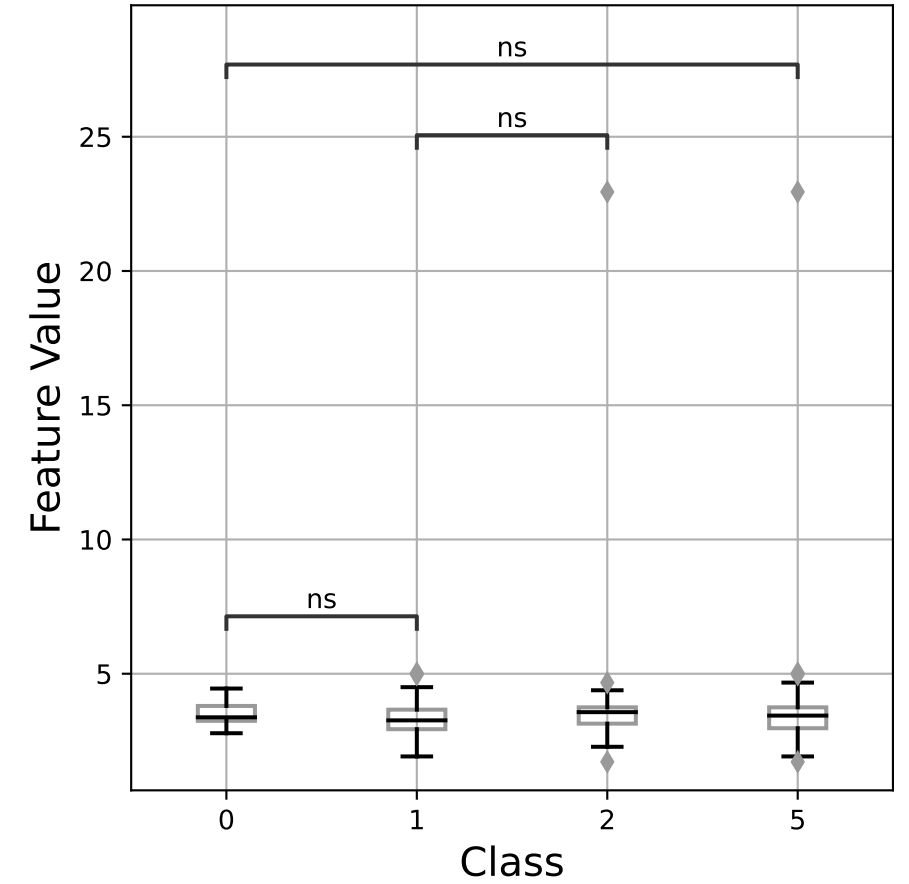

m) Distribution of F12: MeanVelocity

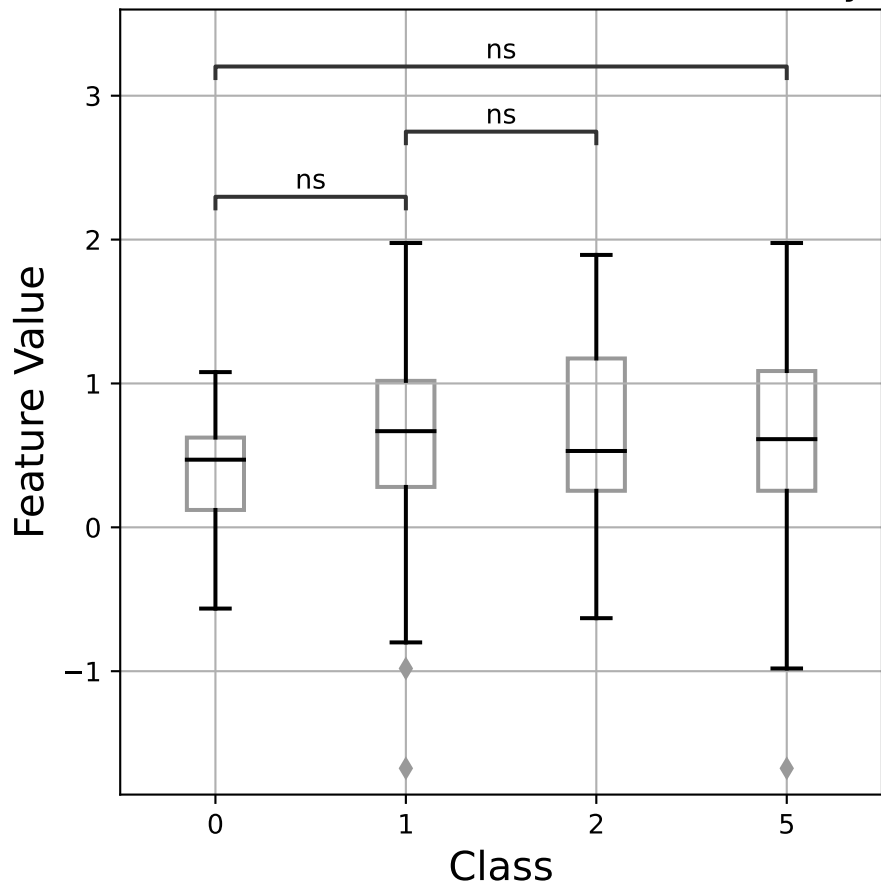

n) Distribution of F13: StDevVelocity

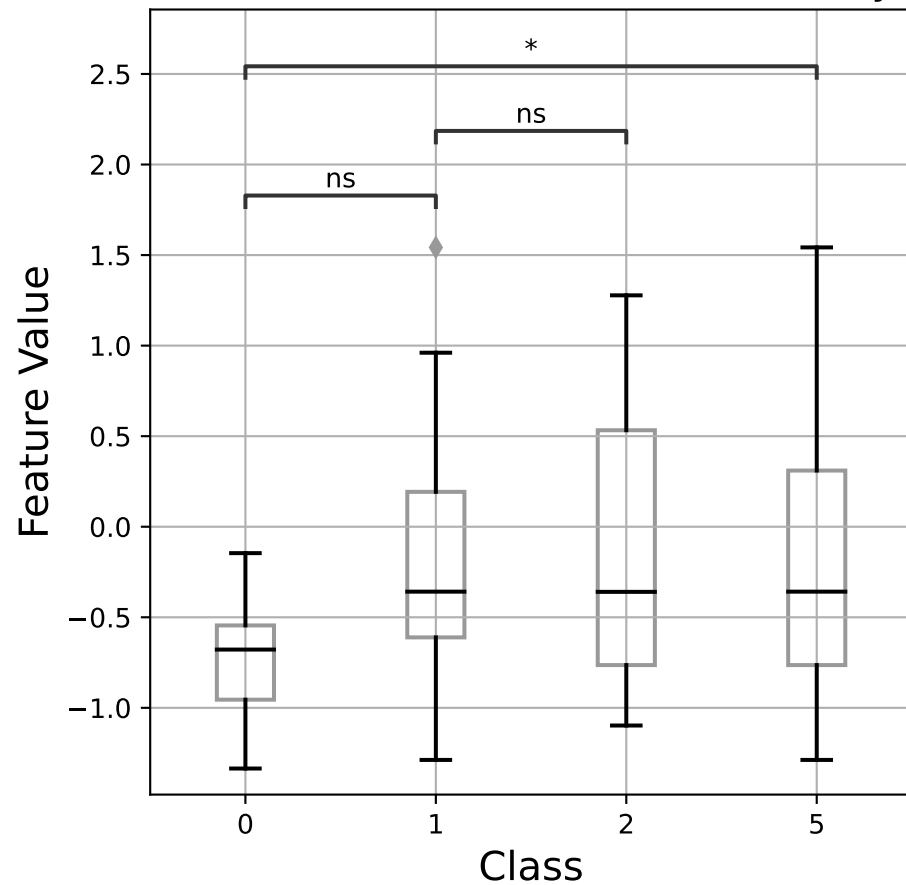

S3: Boxplots of all features with Mann-Whitney-U tests

ns:  $p \leq 1.00e+00$   
 \*:  $1.00e-02 < p \leq 5.00e-02$   
 \*\*:  $1.00e-03 < p \leq 1.00e-02$   
 \*\*\*:  $1.00e-04 < p \leq 1.00e-03$   
 \*\*\*\*:  $p \leq 1.00e-04$
