# Supplementary material for: Utilizing a tablet-based artificial intelligence system to assess movement disorders in a prospective study
Source: PubMed Central journal article supplement (PMC10293248; doi:10.1038/s41598-023-37388-3), 2023-06-26
Supplement: 41598_2023_37388_MOESM4_ESM.pdf [file 41598_2023_37388_MOESM4_ESM.pdf]

#### S4 Results of a Mann-Whitney U test for all features for all three tasks

|                                    | <b>Task 1 PD vs. CG</b> | <b>Task 2 MD vs. CG</b> | <b>Task 3 PD vs. DD</b> |
|------------------------------------|-------------------------|-------------------------|-------------------------|
| <b>QYes</b>                        | U = 88.5, p = < 0.001   | U = 224.5, p = < 0.001  | U = 230.5, p = 0.113    |
| <b>F1c: DistanceFFT</b>            | U = 158.0, p = 0.002    | U = 263.0, p = < 0.001  | U = 379.0, p = 0.193    |
| <b>F2: MaxDistance</b>             | U = 63.0, p = < 0.001   | U = 202.0, p = < 0.001  | U = 293.0, p = 0.712    |
| <b>F3: MeanDistance</b>            | U = 75.0, p = < 0.001   | U = 225.0, p = < 0.001  | U = 304.0, p = 0.877    |
| <b>F4: StDevDistance</b>           | U = 61.0, p = < 0.001   | U = 203.0, p = < 0.001  | U = 304.0, p = 0.877    |
| <b>F5: ChangeOfRadiusDirection</b> | U = 335.0, p = 0.836    | U = 506.0, p = 0.071    | U = 458.0, p = 0.005    |
| <b>F6: ChangeOfDirectionX</b>      | U = 350.0, p = 0.624    | U = 652.0, p = 0.806    | U = 366.0, p = 0.294    |
| <b>F7: ChangeOfDirectionY</b>      | U = 362.0, p = 0.473    | U = 682.0, p = 0.940    | U = 350.0, p = 0.461    |
| <b>F8: MeanForce</b>               | U = 224.0, p = 0.059    | U = 594.0, p = 0.387    | U = 216.0, p = 0.062    |
| <b>F9: StDevForce</b>              | U = 151.0, p = 0.001    | U = 404.0, p = 0.004    | U = 250.0, p = 0.229    |
| <b>F10: MedianForce</b>            | U = 218.0, p = 0.045    | U = 587.0, p = 0.348    | U = 215.0, p = 0.060    |
| <b>F11: TimeOfDrawing</b>          | U = 387.0, p = 0.234    | U = 718.0, p = 0.646    | U = 366.0, p = 0.294    |
| <b>F12: MeanVelocity</b>           | U = 249.0, p = 0.157    | U = 528.0, p = 0.117    | U = 309.0, p = 0.954    |
| <b>F13: StDevVelocity</b>          | U = 178.0, p = 0.006    | U = 381.0, p = 0.002    | U = 338.0, p = 0.614    |
